# Supplementary material
Source: publisher site journal article supplement (https://www.dovepress.com/article/562302)
Supplement: Supplementary file 1 [file 562302%20Revised%20Supplementary%20Material.docx]

Banxia-Xiexin Decoction Ameliorates Colitis-Associated Colorectal Cancer by Modulating Inflammatory Responses and the Complement and Coagulation Cascade Pathway


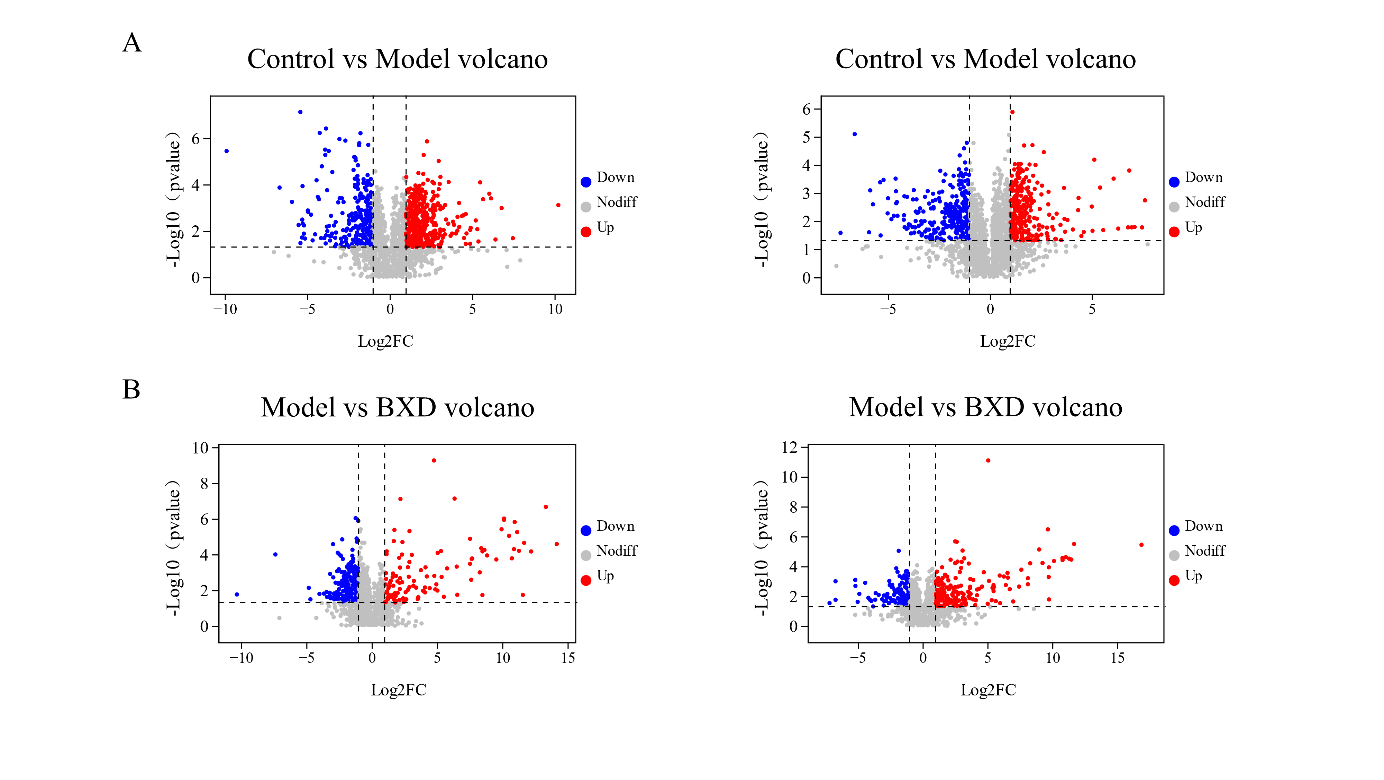


**Figure S1.** A: Control vs Model differential metabolite volcanic map. B:Model vs BXD differential metabolite volcanic map.

**
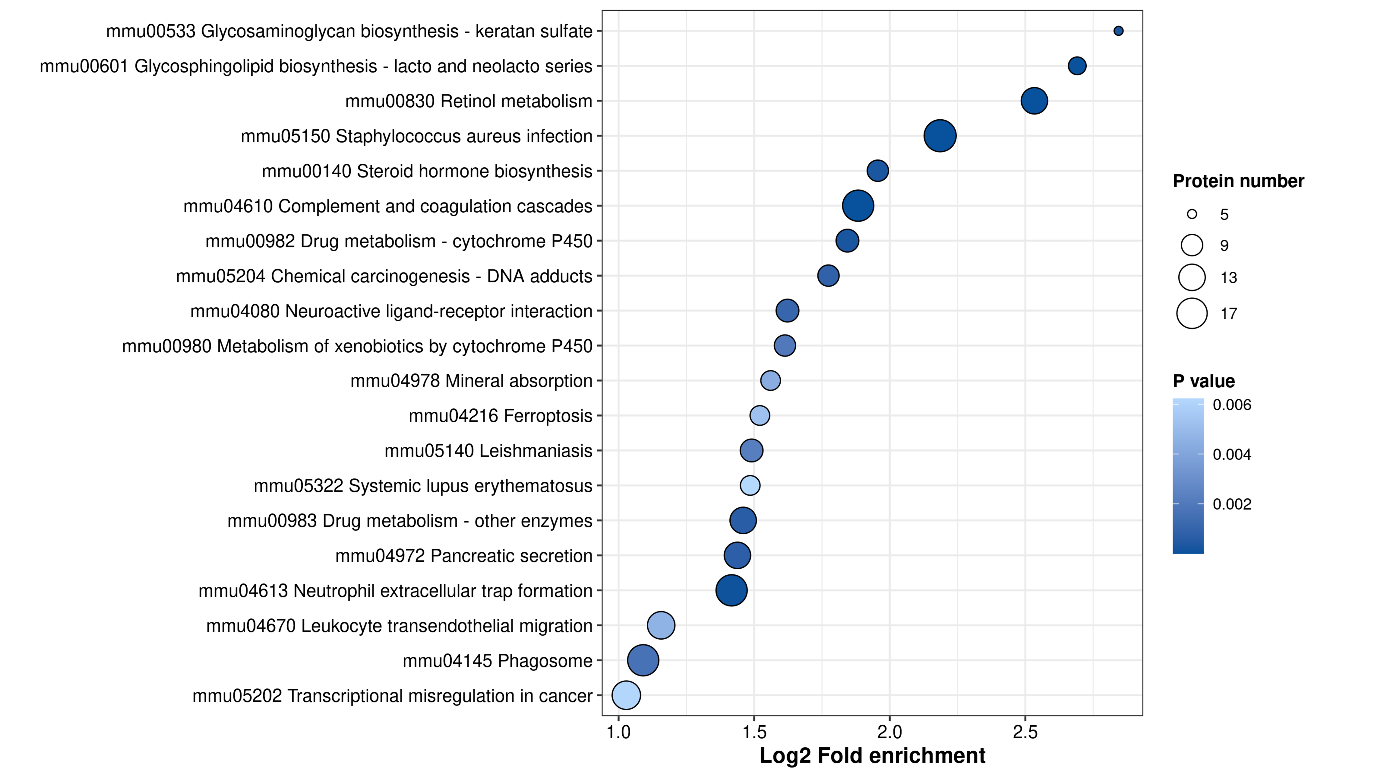
**

**Figure S2.** KEGG enrichment bubble chart of DEPs in the Model vs. Control group.


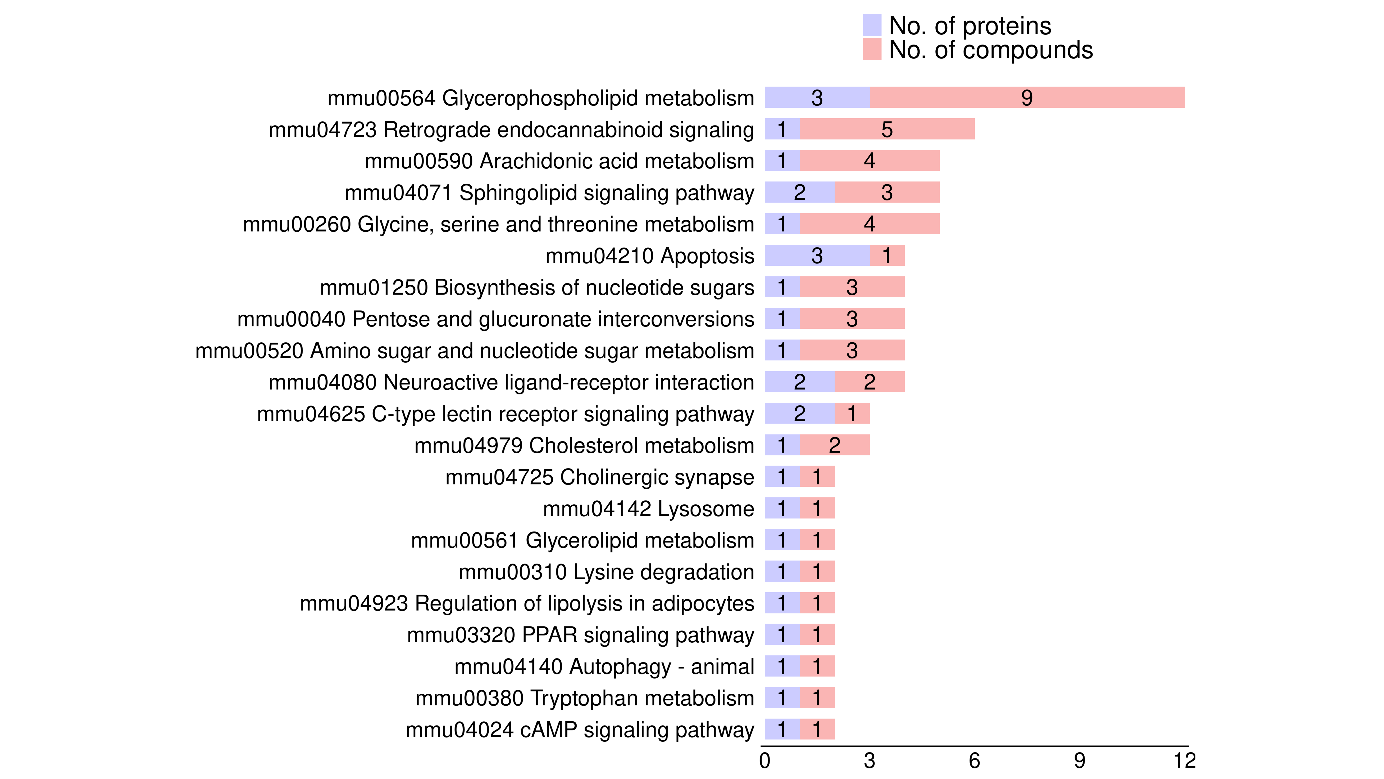


**Figure S3.** Differential Metabolite and Protein pathway classify

Table S1. Constituents of BanxiaXiexin decoction formulations

| Latin name | Chinese name | Medicinal parts | Batch number | Basic phytochemical metabolites | Crude drug(g) in daily prescription |
| --- | --- | --- | --- | --- | --- |
| *Pinellia ternata (Thunb.) Breit.* | Banxia | Dried root | HAZ-20200913 | Choline, Guanosine, Adenine et al | 11.5 |
| *Zingiber officinale Rosc.* | Ganjiang | Dried root | SCX-20201016 | 6-Gingerol, 8-Gingerol, Curcumin et al | 13.8 |
| *Scutellaria baicalensis Georgi* | Huangqin | Dried root | SWY-10100804 | Baicalein, Wogonin, Oroxylin A et al | 13.8 |
| *Coptis chinensis Franch.* | Huanglian | Dried root | CLB-20201017 | Jateorhizine, Epiberberine, Berberine et al | 4.6 |
| *Ziziphus jujuba Mill.* | Dazao | Dried fruit | XMR-20201016 | cyclic adenosine monophosphate (ATP), vitamin C et al | 12 |
| *Glycyrrhiza uralensis Fisch.* | Gancao | Dried root | NCX-20210331 | Liquiritigenin, Glycyrrhetinic acid et al | 13.8 |
| *Panax ginseng C. A. Mey.* | Renshen | Dried root | JBJ-20201015 | Ginsenoside Re, Ginsenoside Rg1 et al | 13.8 |

**ARRIVE Checklist**

**Instructions to authors**

Complete this checklist by entering the page numbers from your manuscript where readers will find each of the items listed below.

Your article may not currently address all the items on the checklist. Please modify your text to include the missing information. If you are certain that an item does not apply, please write "n/a" and provide a short explanation.

Upload your completed checklist as an extra file when you submit to a journal.

|  |  | Reporting Item | Page Number |
| --- | --- | --- | --- |
| **Essential 10** |  |  |  |
| Study design | [#1a](https://www.goodreports.org/reporting-checklists/arrive2/info/#1a) | Give details of the groups being compared, including control groups. If no control group has been used, the rationale should be stated. | 6 |
| Study design | [#1b](https://www.goodreports.org/reporting-checklists/arrive2/info/#1b) | Give details of the experimental unit (e.g., a single animal, litter, or cage of animals). | 6 |
| Sample size | [#2a](https://www.goodreports.org/reporting-checklists/arrive2/info/#2a) | Specify the exact number of experimental units allocated to each group, and the total number in each experiment. Also indicate the total number of animals used. | 6 |
| Sample size | [#2b](https://www.goodreports.org/reporting-checklists/arrive2/info/#2b) | Explain how the sample size was decided. Provide details of any a priori sample size calculation, if done. | n/a |
| Inclusion and exclusion criteria | [#3a](https://www.goodreports.org/reporting-checklists/arrive2/info/#3a) | Describe any criteria used for including or excluding animals (or experimental units) during the experiment, and data points during the analysis. Specify if these criteria were established a priori. If no criteria were set, state this explicitly. | n/a .During the course of the study, no animals or data points were excluded from analysis for any reason. |
| Inclusion and exclusion criteria | [#3b](https://www.goodreports.org/reporting-checklists/arrive2/info/#3b) | For each experimental group, report any animals, experimental units, or data points not included in the analysis and explain why. If there were no exclusions, state so. | n/a .During the course of the study, no animals or data points were excluded from analysis for any reason. |
| Inclusion and exclusion criteria | [#3c](https://www.goodreports.org/reporting-checklists/arrive2/info/#3c) | For each analysis, report the exact value of n in each experimental group. | 6 |
| Randomisation | [#4a](https://www.goodreports.org/reporting-checklists/arrive2/info/#4a) | State whether randomisation was used to allocate experimental units to control and treatment groups. If done, provide the method used to generate the randomisation sequence. | Mice were randomly allocated to experimental groups (n=8 per group) using a random number table generated in Microsoft Excel prior to the start of the experiment. Cage positions in the animal facility were randomly rotated weekly to reduce potential bias from environmental gradients (light, temperature, humidity). The order of sample collection and data acquisition was randomised to minimise measurement bias. |
| Randomisation | [#4b](https://www.goodreports.org/reporting-checklists/arrive2/info/#4b) | Describe the strategy used to minimise potential confounders such as the order of treatments and measurements, or animal/cage location. If confounders were not controlled, state this explicitly. | Mice were randomly allocated to experimental groups (n=8 per group) using a random number table generated in Microsoft Excel prior to the start of the experiment. Cage positions in the animal facility were randomly rotated weekly to reduce potential bias from environmental gradients (light, temperature, humidity). The order of sample collection and data acquisition was randomised to minimise measurement bias. |
| Blinding | [#5](https://www.goodreports.org/reporting-checklists/arrive2/info/#5) | Describe who was aware of the group allocation at the different stages of the experiment (during the allocation, the conduct of the experiment, the outcome assessment, and the data analysis). | Investigators responsible for animal allocation and treatment administration were aware of group allocation. However, outcome assessors for histology, ELISA, metabolomics, and proteomics analyses, as well as those performing statistical analyses, were blinded to group allocation until data analysis was completed. |
| Outcome measures | [#6a](https://www.goodreports.org/reporting-checklists/arrive2/info/#6a) | Clearly define all outcome measures assessed (e.g., cell death, molecular markers, or behavioural changes). | 9-13 |
| Outcome measures | [#6b](https://www.goodreports.org/reporting-checklists/arrive2/info/#6b) | For hypothesis-testing studies, specify the primary outcome measure, i.e., the outcome measure that was used to determine the sample size. | 9-13 |
| Statistical methods | [#7a](https://www.goodreports.org/reporting-checklists/arrive2/info/#7a) | Provide details of the statistical methods used for each analysis, including software used. | 9 |
| Statistical methods | [#7b](https://www.goodreports.org/reporting-checklists/arrive2/info/#7b) | Describe any methods used to assess whether the data met the assumptions of the statistical approach, and what was done if the assumptions were not met. | 9 |
| Experimental animals | [#8a](https://www.goodreports.org/reporting-checklists/arrive2/info/#8a) | Provide species-appropriate details of the animals used, including species, strain and substrain, sex, age or developmental stage, and, if relevant, weight. | 5 |
| Experimental animals | [#8b](https://www.goodreports.org/reporting-checklists/arrive2/info/#8b) | Provide further relevant information on the provenance of animals, health/immune status, genetic modification status, genotype, and any previous procedures. | 5 |
| Experimental procedures | [#9a](https://www.goodreports.org/reporting-checklists/arrive2/info/#9a) | For each experimental group, including controls, describe the procedures in enough detail to allow others to replicate what was done, how it was done, and what was used. | 6-8 |
| Experimental procedures | [#9b](https://www.goodreports.org/reporting-checklists/arrive2/info/#9b) | Timing and frequency of procedures | 6 |
| Experimental procedures | [#9c](https://www.goodreports.org/reporting-checklists/arrive2/info/#9c) | Where procedures were carried out (including detail of any acclimatisation periods). | 5 |
| Experimental procedures | [#9d](https://www.goodreports.org/reporting-checklists/arrive2/info/#9d) | Rationale for procedures | The AOM/DSS protocol was selected as it is an established model for mimicking colitis-associated colorectal cancer (CAC), combining a carcinogen (AOM) to initiate tumorigenesis and repeated cycles of dextran sulfate sodium (DSS) to induce chronic colonic inflammation. This model closely reflects the pathophysiological progression from colitis to dysplasia and carcinoma observed in human CAC. Dosages of BXD were calculated based on clinical human-equivalent doses via body surface area conversion to ensure translational relevance. Sulfasalazine was used as a positive control drug due to its clinical application in inflammatory bowel disease. |
| Results | [#10a](https://www.goodreports.org/reporting-checklists/arrive2/info/#10a) | For each experiment conducted, including independent replications, report summary/descriptive statistics for each experimental group, with a measure of variability where applicable (e.g., mean and SD, or median and range). 9-13 |
|  |  |
| Results | [#10b](https://www.goodreports.org/reporting-checklists/arrive2/info/#10b) | If applicable, for each experiment conducted, including independent replications, report the effect size with a confidence interval. | 9-13 |
| **Recommended set** |  |  |  |
| Abstract | [#11](https://www.goodreports.org/reporting-checklists/arrive2/info/#11) | Provide an accurate summary of the research objectives, animal species, strain and sex, key methods, principal findings, and study conclusions. | 1 |
| Background | [#12a](https://www.goodreports.org/reporting-checklists/arrive2/info/#12a) | Include sufficient scientific background to understand the rationale and context for the study, and explain the experimental approach. | 3 |
| Background | [#12b](https://www.goodreports.org/reporting-checklists/arrive2/info/#12b) | Explain how the animal species and model used address the scientific objectives and, where appropriate, the relevance to human biology. | The azoxymethane/dextran sulfate sodium (AOM/DSS) mouse model is widely used to recapitulate the initiation and progression of CAC in humans. It combines a colon-specific carcinogen (AOM) with repeated DSS-induced colitis to mimic the persistent inflammation–tumorigenesis sequence observed in patients. C57BL/6 mice are particularly suitable for this model due to their well-characterized immune responses, genetic background, and consistent susceptibility to AOM/DSS-induced lesions, which enhances experimental reproducibility and translational relevance to human CAC pathophysiology. |
| Objectives | [#13](https://www.goodreports.org/reporting-checklists/arrive2/info/#13) | Clearly describe the research question, research objectives and, where appropriate, specific hypotheses being tested. | This study aimed to evaluate the therapeutic potential of BXD in a murine model of CAC induced by AOM/DSS and to elucidate its underlying mechanisms of action. We hypothesised that BXD treatment would attenuate CAC progression by reducing colonic inflammation and modulating inflammation-associated metabolic and proteomic alterations. Specifically, we sought to:  Assess the effects of BXD at different dosages on clinical symptoms, colonic tumor burden, and histopathology in CAC mice.  Quantify changes in serum inflammatory cytokines in response to BXD treatment.  Identify key metabolic and proteomic alterations associated with CAC and determine the impact of BXD on these molecular pathways, with a focus on glycerophospholipid metabolism and complement/coagulation cascades. |
| Ethical statement | [#14](https://www.goodreports.org/reporting-checklists/arrive2/info/#14) | Provide the name of the ethical review committee or equivalent that has approved the use of animals in this study and any relevant licence or protocol numbers (if applicable). If ethical approval was not sought or granted, provide a justification. | 5 |
| Housing and husbandry | [#15](https://www.goodreports.org/reporting-checklists/arrive2/info/#15) | Provide details of housing and husbandry conditions, including any environmental enrichment. | 5 |
| Animal care and monitoring | [#16a](https://www.goodreports.org/reporting-checklists/arrive2/info/#16a) | Describe any interventions or steps taken in the experimental protocols to reduce pain, suffering, and distress. | 5 |
| Animal care and monitoring | [#16b](https://www.goodreports.org/reporting-checklists/arrive2/info/#16b) | Report any expected or unexpected adverse events. | As expected, mice receiving AOM/DSS developed weight loss, diarrhoea, and occasional rectal bleeding, which are characteristic of the model. No unexpected severe adverse events or accidental deaths were observed throughout the study. All animals survived to the planned endpoint. |
| Animal care and monitoring | [#16c](https://www.goodreports.org/reporting-checklists/arrive2/info/#16c) | Describe the humane endpoints established for the study, the signs that were monitored, and the frequency of monitoring. If the study did not set humane endpoints, state this. | Humane endpoints were pre-specified before study initiation. Animals were monitored at least once daily during the acclimatisation period, and twice daily during DSS treatment cycles. Parameters recorded included body weight, general appearance (fur condition, posture), behaviour (activity level, social interaction), and stool characteristics (consistency, presence of blood). |
| Interpretation/scientific implications | [#17a](https://www.goodreports.org/reporting-checklists/arrive2/info/#17a) | Interpret the results, taking into account the study objectives and hypotheses, current theory, and other relevant studies in the literature. | 13-16 |
| Interpretation/scientific implications | [#17b](https://www.goodreports.org/reporting-checklists/arrive2/info/#17b) | Comment on the study limitations, including potential sources of bias, limitations of the animal model, and imprecision associated with the results. | 14 |
| Generalisability/translation | [#18](https://www.goodreports.org/reporting-checklists/arrive2/info/#18) | Comment on whether, and how, the findings of this study are likely to generalise to other species or experimental conditions, including any relevance to human biology (where appropriate). | 16 |
| Protocol registration | [#19](https://www.goodreports.org/reporting-checklists/arrive2/info/#19) | Provide a statement indicating whether a protocol (including the research question, key design features, and analysis plan) was prepared before the study, and if and where this protocol was registered. | 5 |
| Data access | [#20](https://www.goodreports.org/reporting-checklists/arrive2/info/#20) | Provide a statement describing if and where study data are available. | The datasets generated and/or analysed during the current study are available from the corresponding author on reasonable request. |
| Declaration of interests | [#21a](https://www.goodreports.org/reporting-checklists/arrive2/info/#21a) | Declare any potential conflicts of interest, including financial and nonfinancial. If none exist, this should be stated. | The authors declare that they have no known competing financial interests or personal relationships that could have appeared to influence the work reported in this paper. |
| Declaration of interests | [#21b](https://www.goodreports.org/reporting-checklists/arrive2/info/#21b) | List all funding sources (including grant identifier) and the role of the funder(s) in the design, analysis, and reporting of the study. | This study was supported by the Jilin Province Science and Technology Development Plan, grant number 20220204002YY. |

Note: The ARRIVE checklist is distributed under the terms of the Creative Commons Attribution License CC-BY.40 This checklist can be completed online using <https://www.goodreports.org/>, a tool made by the [EQUATOR Network](https://www.equator-network.org) in collaboration with [Penelope.ai](https://www.penelope.ai)
